# Supplementary material for: Ac2-26 attenuates hepatic ischemia-reperfusion injury in mice via regulating IL-22/IL-22R1/STAT3 signaling
Source: PeerJ. 2022 Sep 28;10:e14086. doi: 10.7717/peerj.14086 (PMC9526407; doi:10.7717/peerj.14086)
Supplement: Supplemental Information 1 [file peerj-10-14086-s001.xlsx]

## Sheet: Sheet1
	Figure 1A
		Control	H2O2	H2O2+Ac2-26	Ac2-26
	Group 1	1	0.510605	1.16641	1.00077
	Group 2	0.972619	0.216994	0.527946	0.704332
	Group 3	0.956293	0.333076	1.03625	0.766551
	Figure 1B
		Contolt	H2O2	H2O2+Ac-26	Ac2-26
	Group 1	0.655089	6.99066	7.35343	0.644945
	Group 2	0	13.167	4.74885	1.25315
	Group 3	0	11.7993	2.79879	2.82759
	Group 4	0.568751	21.1911	2.43654	1.32613
	Group 5	0.564229	13.7317	2.14486	0.706419
	Figure 2B
		Sham	I/R	I/R+Ac2-26	Ac2-26
	Group 1	0.8	5.8	2.1	1
	Group 2	0.8	4.9	1.7	1.1
	Group 3	0.9	5.2	1.9	0.9
	Figure 3A
		Shan	I/R	I/R+Ac2-26	Ac2-26
	Group 1	338	506.25	379.75	325.75
	Group 2		300	200	95
	Group 3			165	156.25
	Group 4	72.5	280.625	242.5	238.125
	Group 5	55.625		133.75	163.125
	Group 6	72.5	280.625	242.5	238.125
	Group 7	72.5	606.25	303.125	187.5
	Figure 3B
		Sham	I/R	I/R+Ac2-26	Ac2-26
	Group 1	0.696263	0.940393	0.591917	0.605513
	Group 2	0.74831	0.884244	0.673028	0.65357
	Group 3	0.457861	0.781269	0.663809	0.451856
	Group 4	0.465978	0.613631	0.501195	0.460963
	Group 5	0.484482	0.869546	0.82666	0.532406
	Group 6	0.580891	0.862083	0.649409	0.810016
	Figure 3C
		Sham	I/R	I/R+Ac2-26	Ac2-26
	Group 1	0.644196	0.895036	0.506274	0.588407
	Group 2	0.538834	1.21158	0.927839	0.550214
	Group 3	0.796998	1.00533	0.829798	0.880253
	Group 4	0.452762	0.821396	0.726419	0.717454
	Group 5	0.625979	1.07177	0.833104	0.794589
	Figure 3D
		Sham	I/R	I/R+Ac2-26	Ac2-26
	Group1	0.688995	0.772796	0.75064	0.557715
	Group2	0.707588	0.934001	0.863887	0.407291
	Group3	0.743188	0.83956	0.745002
	Group4	0.459022	0.727385	0.537931	1.07425
	Group5	0.938336	1.29914	0.829828
	Group6	0.707426	0.914576	0.745458	0.584526
	Group7	0.475662	1.07706	0.613361	0.609872
	Group8	0.672384	1.17766	0.822798	1.04336
	Figure 4C
		Control	H2O2	H2O2+Ac2-26	Ac2-26
	Group1	16.54	24.58	13	13.4
	Group2	16.5	27.5	23.5	14
	Group3	12.9	26.43	16.5	20.3
	Group4	16.08	49.2	29.56
	Group5		41.1	22.93	17.78
	Figure 4D
		Sham	I/R	I/R+Ac2-26	Ac2-26
	Group1	0.633637	0.961072	0.686603	0.85676
	Group2	0.626844	0.782989	0.433195	0.672903
	Group3	0.36514	0.536129		0.461079
	Group4	0.742167	1.00073	0.818713	0.736636
	Group5	0.722351	1.06371	0.726018	0.432467
	Group6		1.04963	0.75518	0.754127
	Group7	0.783008	0.934624	0.595488	0.64067
	Group8		1.34243	0.61087	0.505767
	Figure 4E
		Bax
		Sham	I/R	I/R+Ac2-26	Ac2-26
	Group1	1.08144	1.20785	1.00872	0.940503
	Group2	1.03708	1.16842	0.576525	0.533823
	Group3	0.772158	1.00586	0.955815	0.970565
	Group3	0.83779	1.67711	1.16762	0.931153
	Group4	0.463026	1.07974	0.915507	0.685033
	Group5	0.679814	1.00501	0.609862	0.876688
		Bcl-2
		Sham	I/R	I/R+Ac2-26	Ac2-26
	Group1	0.731326	0.548581	0.701243
	Group2	0.759902	0.626727	0.643561	0.738184
	Group3	0.795104	0.512232	0.729837	0.614785
	Group3		0.72321	0.850433	0.912136
	Group4	0.756665	0.665237	0.705071	0.642182
	Group5	0.939385		0.819793	0.724132
		Bax/Bcl-2
		Sham	I/R	I/R+Ac2-26	Ac2-26
	Group1	1.35778	1.96335	1.36008	1.29495
	Group2		1.89926	0.777348	0.735006
	Group3	0.969468	1.63502	1.28876	1.33634
	Group3	1.05187	2.72614	1.57434	1.28208
	Group4	0.581343	1.75512	1.23441	0.943203
	Group5	0.853527	1.63364	0.822297	1.20709
	Figure 5A
		Sham	I/R	I/R+Ac2-26	Ac2-26
	Group 1	1.58689	2.1803	1.9851	1.71637
	Group 2	2.14648	6.77602	1.24857	1.09167
	Group 3	2.17567	9.92225	3.17897	2.37701
	Group 4	1.10688	5.23612	2.49248	2.06092
	Group 5	2.44406	5.47425	3.35275	2.3611
	Figure 5B
		Control	H2O2	H2O2+AC2-26	AC2-26	Rosup
	Group1	1	9	5.4	4	7.2
	Group2	2.2	14.7	3	0.7	30.7
	Group3	3.7	14.9	1.8	1.2	7.2
	Group4	1.4	15.3	2.4	1.7	7.8
	Group5	3.3	10.3	4.6	8	30.6
				4.6	6.6
				3.9
	Figure 6A
			mtATP6/Rp113
			Control	H2O2	H2O2+Ac2-26
		Group1	1	1.75213	0.87768
		Group2	0.86764	1.4259	1.01697
		Group3	0.75645	1.17344	0.85405
	Figure 6B
			COX-1
			Control	H2O2	H2O2+Ac2-26
		Group1	1	0.55287	0.8099
		Group2	0.84578	0.60481	1.19331
		Group3	1.02591	0.71856	1.28068
	Figure 6C
			VD1
			Control	H2O2	H2O2+Ac2-26
		Group1	1	0.76578	1.19334
		Group2	0.96594	0.66985	0.86559
		Group3	1.32132	0.5722	1.27607
	Figure 6D
		positive control	H2O2	H2O2+AC2-26	AC2-26	Negtive control
	Group1	59.2	38.5	54.3	68.9	2.4
	Group2	74.1	61.5	76.3	78.1	11.6
	Group3	84	52.1	65.7	81.2	5.1
	Group4	88.4		72.8	86.3
	Figure 6F
		Control	H2O2	H2O2+IAC2-26	AC2-26
	Group1	38.859	11.334	27.217	35.588
	Group2	32.137	10.066	26.666	30.167
	Group3	34.042	12.905	27.918	33.835
	Group4	29.187	7.677	18.849	30.807
	Group5	29.507	10.124	21.41	23.636
	Figure 6G
		Control	H2O2	H2O2+Ac2-26	Ac2-26
	Group1	1.04835	0.724864	0.869398	0.972642
	Group2	1.13783	0.958877	1.01394	1.04491
	Group3	0.827881	0.362262	0.714347	0.745308
	Group4	0.979257	0.538873	0.669612	0.937971
	Group5	1.12376	0.470062	0.73154	0.910446
	Group6	0.882923	0.717778	0.73154	0.855397
	Figure 7A
		Sham	I/R	I/R+Ac2-26	Ac2-26
	Group1	1.97172	11.5741	8.35113	1.21902
	Group2	0.810559	10.9282	3.78884	2.70099
	Group3	1.65975	12.4946		2.22931
	Group4	1.70836	12.4849		1.07198
	Group5	0.9389	17.0013	9.77493	2.00409
	Figure 7B
		Sham	I/R	I/R+Ac2-26	Ac2-26
	Group1	1.31409	2.87268	1.94207	1.29986
	Group2	1.09165		1.47633
	Group3	1.24851	2.5933	1.0022
	Group4	0.789222	2.45108	1.31202	1.05157
	Group5	1.81639	4.61905	1.22261	1.20144
	Figure 7C
		sham	IR24	IR24+AC2-26	AC2-26
	Group 1	0.716953	1.04738	0.584138	0.557828
	Group 2	0.573933	1.02253	0.52382	0.627535
	Group 2	0.748144	1.06621	0.542806	0.646134
	Group 4	0.82408	1.01525	0.933389	0.686425
	Figure 7D
		Sham	I/R	I/R+Ac2-26	Ac2-26
	Group 1	0.545456	0.906843	0.72135	0.626689
	Group 2	0.44184	1.61054	0.600224	0.49169
	Group 2	0.466905	1.26785	0.2749	0.404574
	Group 4	0.586182	1.19825	0.761261	0.428854
	Group 5	0.718775	1.88351	1.12277	1.26089
	Figure 8A
		sham	IR24h	IR24h+AC2-26	AC2-26
	Group1	0.20776	1.35814	1.01918	0.705362
	Group2	0.255572	0.97328	0.775392	0.511623
	Group3	0.172483	1.18637	0.679905	0.616742
	Group4	0.259087	1.88641	1.28075	0.755943
	Group5	0.0510687	1.94801	0.73025	0.799352
	Group6	0.596477	3.8589	1.89187	0.52215
	Figure 8B
		Control	H2O2	H2O2+AC2-26	AC2-26
	Group1	0.714203	1.63364	0.987519	0.448376
	Group2	0.227413	1.24074	0.902864	0.210125
	Group3	0.695786	1.48065	1.45687	0.766358
	Group4	0.36708		0.643853	0.225372
	Group5	0.878794	1.64707	1.29858	1.41823
	Group6	0.966134	2.50381		1.30802
	Figure 9B
		Control	H2O2	H2O2+Ac2-26	H2O2+Ac2-26+CLN
	Group1	1	0.536919	0.735639	0.489847
	Group2	1.04827		0.9537	0.563587
	Group3	0.784767	0.483367	0.73475	0.562867
	Group4	1.03137	0.68569	0.892417	0.691933
	Figure 9D
		Control	H2O2	H2O2+Ac2-26	H2O2+Ac2-26+Colivelin TFA
	Group1	4.72993	38.0165	8.84615	21.6667
	Group2	4.2628	13.1579	5.64516	22.8571
	Group3	3.36375	23.622	13.7037	18.6441
	Group4	0.769231	39.2157	5.69106	18.6916
	Group5	2.34375	15.7698	4.6729	13.8614
	Fig.S1
	。			H2O2+Ac2-26+CLN
	control	H2O2	H2O2+Ac2-26	0.5 μM	1.0 μM	10 μM	20 μM
Group1	1	0.536919	0.735639	0.524157	0.489847	0.81016	0.74483
Group2	0.784767	0.483367	0.73475	0.4216	0.562867	0.5821	0.653633
Group3	1.03137	0.68569	0.892417	0.837133	0.691933	0.644333	0.6868
Group4	1.04827	0.571469	0.9537	0.557449	0.563587	0.821867	0.64739
	Fig.S2
			H2O2+Ac2-26							Ac2-26
	control	H2O2	0.1 μM	0.3 μM	0.5 μM	0.8 μM	1.0 μM	1.5 μM	2.0 μM	0.8 μM
Group1	1	0.510605	0.821249	0.227341	0.257972	1.16641	0.610272	0.592649	0.268546	1.00077
Group2	0.972619	0.216994	0.395267	0.526519	0.417254	0.527946	0.381336	0.403155	0.318563	0.704332
Group3	0.956293	0.333076	0.700906	0.654414	0.965509	1.03625	0.911547	0.619335	0.586858	0.766551
	Fig. S3
			I/R+Ac2-26
	Sham	I/R	100 μg/kg	250 μg/kg	400 μg/kg
Group1	35.1617	611.148	637.715	530.343	609.958
Group2	16.4054	633.895	654.847	596.822	632.677
Group3	18.6596	646.877	717.595	515.499	641.145
Group4	18.6905	618.172	609.811	570.817	589.814
