# Supplementary material for: Ac2-26 attenuates hepatic ischemia-reperfusion injury in mice via regulating IL-22/IL-22R1/STAT3 signaling
Source: PeerJ. 2022 Sep 28;10:e14086. doi: 10.7717/peerj.14086 (PMC9526407; doi:10.7717/peerj.14086)
Supplement: Supplemental Information 8 [file peerj-10-14086-s008.xlsx]

## Sheet: Sheet1
	OD value
	0.0096	0.2174	0.3435	0.6378	1.2502	2.2308	3.5783	3.7235
	0.0041	0.1829	0.3483	0.6019	1.2334	2.3064	3.639	3.7789
	0.0181	0.177	0.1501	0.6242	1.2027	2.3625	3.6785	3.8431
	0.5806	1.2839	0.7753	0.6461	0.6124	1.5459	0.7179	0.7144
	0.8203	1.6007	0.8642	0.8706	0.7152	1.6288	0.7964	0.886
	0.6613	0.2102	0.4998	0.6093	0.4908	0.2348	0.2402	0.4612
	0.5913	0.2235	0.5521	0.4151	0.3438	0.2462	0.4181	0.4771
	0.8036	0.9296	0.8002	0.8354	0.3864	1.2291	0.6534	0.4939
	0.56	1.2371	1.1103	0.7395	0.4102	1.5819	0.5072	0.4348
	0.4975	0.2471	0.3199	0.3056	0.3803	0.1662	0.2422	0.3725
	0.3265	0.2922	0.3052	0.4064	0.3125	0.2018	0.274	0.4362
standard curve line	0	0.25	0.5	1	2	4	6	8
	0.0096	0.2174	0.3435	0.6378	1.2502	2.2308	3.5783	3.7235
		0.1829	0.3483	0.6019	1.2334	2.3064	3.639	3.7789
	0.0181	0.177		0.6242	1.2027	2.3625	3.6785	3.8431
	0.01385	0.192433	0.3459	0.6213	1.22877	2.2999	3.63193	3.78183
	Group 1				Group 2				Group 3				Group 4
	Group 1				Group 2				Group 3				Group 4
	sham	I/R	IR+Ac2-26	Ac2-26	sham	I/R	IR+Ac2-26	Ac2-26	sham	I/R	IR+Ac2-26	Ac2-26	sham	I/R	IR+Ac2-26	Ac2-26
	0.5806	1.2839	0.7753	0.6461	0.6124	1.5459	0.7179	0.7144	0.8036	0.9296	0.8002	0.8354	0.3864	1.2291	0.6534	0.4939
	0.8203	1.6007	0.8642	0.8706	0.7152	1.6288	0.7964	0.886	0.56	1.2371	1.1103	0.7395	0.4102	1.5819	0.5072	0.4348
	0.70045	1.4423	0.81975	0.75835	0.6638	1.58735	0.75715	0.8002	0.6818	1.08335	0.95525	0.78745	0.3983	1.4055	0.5803	0.46435
NADP total	1.13536	2.38975	1.33708	1.23326	1.07339	2.63502	1.23123	1.30402	1.10382	1.7828	1.5662	1.28247	0.62445	2.32753	0.932195	0.736135
	Group 1				Group 2				Group 3				Group 4
	sham	I/R	IR+Ac2-26	Ac2-26	sham	I/R	IR+Ac2-26	Ac2-26	sham	I/R	IR+Ac2-26	Ac2-26	sham	I/R	IR+Ac2-26	Ac2-26
	0.6613	0.2102	0.4998	0.6093	0.4908	0.2348	0.2402	0.4612	0.4975	0.2471	0.3199	0.3056	0.3803	0.1662	0.2422	0.3725
	0.5913	0.2235	0.5521	0.4151	0.3438	0.2462	0.4181	0.4771	0.3265	0.2922	0.3052	0.4064	0.3125	0.2018	0.274	0.4362
	0.6263	0.21685	0.52595	0.5122	0.4173	0.2405	0.32915	0.46915	0.412	0.26965	0.31255	0.356	0.3464	0.184	0.2581	0.40435
NADPH	1.00998	0.317636	0.840294	0.817044	0.656578	0.357626	0.507525	0.744251	0.647616	0.406916	0.479456	0.552925	0.536693	0.26209	0.387386	0.63468
NADP+	0.12538	2.07212	0.496787	0.416216	0.416808	2.27739	0.723706	0.559773	0.456206	1.37589	1.08674	0.72954	0.0877579	2.06544	0.544809	0.101454
NADP+/NADPH	0.124142	6.52356	0.591206	0.509416	0.634818	6.36809	1.42595	0.75213	0.704439	3.38126	2.26662	1.31942	0.163516	7.88065	1.40637	0.159851
	NADPH				NADP+				NADP+/NADPH
	sham	I/R	IR+Ac2-26	Ac2-26	sham	I/R	IR+Ac2-26	Ac2-26	sham	I/R	IR+Ac2-26	Ac2-26
	1.00998	0.317636	0.840294	0.817044	0.12538	2.07212	0.496787	0.416216	0.124142	6.52356	0.591206	0.509416
	0.656578	0.357626	0.507525	0.744251	0.416808	2.27739	0.723706	0.559773	0.634818	6.36809	1.42595	0.75213
	0.647616	0.406916	0.479456	0.552925	0.456206	1.37589	1.08674	0.72954	0.704439	3.38126	2.26662	1.31942
	0.536693	0.26209	0.387386	0.63468	0.0877579	2.06544	0.544809	0.101454	0.163516	7.88065	1.40637	0.159851
